# Supplementary material
Source: ML conference proceedings conference paper supplement (https://aclanthology.org/P12-2067)
Supplement: Datasets [file P12-2067.Datasets.zip]

# Exploiting Latent Information to Predict Diffusion of Novel Topics on Social Networks

## Introduction

This is the readme for the resource of the "Exploiting Latent Information to Predict Diffusion of Novel Topics on Social Networks" research, including [dataset](#) and [source code](#).

## Software Platform

We use Java as our development platform. Please install [Java 1.6.0](#) or above in order to execute or modify our source code.

## Hardware Platform

We suggest using AMD Opteron 2350 2.0GHz Quad-core CPU or above, 32GB RAM or above, and 500GB hard disk space to run the program.

## Acknowledgement

We used these libraries in our program (in alphabetical order):

|                                                  |                                                                                                         |
|--------------------------------------------------|---------------------------------------------------------------------------------------------------------|
| <i>Apache Common Math 1.2 or above</i>           | <a href="http://commons.apache.org/math">http://commons.apache.org/math</a>                             |
| <i>Apache Collections-Generic 4.0.1 or above</i> | <a href="http://larvalabs.com/collections/">http://larvalabs.com/collections/</a>                       |
| <i>AUC Calculator 0.2 or above</i>               | <a href="http://mark.goadrich.com/programs/AUC/">http://mark.goadrich.com/programs/AUC/</a>             |
| <i>BLAS 0.8 or above</i>                         | <a href="http://www.netlib.org/blas/">http://www.netlib.org/blas/</a>                                   |
| <i>JUNG 2.2.0 or above</i>                       | <a href="http://jung.sourceforge.net/">http://jung.sourceforge.net/</a>                                 |
| <i>LIBLINEAR 1.5.1 or above</i>                  | <a href="http://www.csie.ntu.edu.tw/~cjlin/liblinear/">http://www.csie.ntu.edu.tw/~cjlin/liblinear/</a> |

## Getting Started

1. Please extract "Software.zip". Several important directories are listed below:

|                             |                                                                             |
|-----------------------------|-----------------------------------------------------------------------------|
| <a href="#"><i>src</i></a>  | Source code of our program                                                  |
| <a href="#"><i>jar</i></a>  | JAR file of our program (for quick start)                                   |
| <a href="#"><i>lib</i></a>  | Directory for required libraries                                            |
| <a href="#"><i>data</i></a> | Data files (the content of "Dataset.zip should be put under this directory) |

2. Please extract "Dataset.zip" and copy the files and directories to [data/plurk\\_iii](#).
3. Among the source codes in the [src](#) directory or JAR file in the [jar](#) directory, five Java classes are designed to be run directly, and the results are displayed in system console:

|                                    |                                                              |
|------------------------------------|--------------------------------------------------------------|
| <a href="#">PrepareData.java</a>   | Main class for preparing data                                |
| <a href="#">BaselineDF.java</a>    | Main class for baseline diffusion number for existing topics |
| <a href="#">BaselineIC.java</a>    | Main class for baseline Independent Cascade (IC) model       |
| <a href="#">BaselineHD.java</a>    | Main class for baseline Heat Diffusion (HD) model            |
| <a href="#">LearningBased.java</a> | Main class for our proposed supervised learning framework    |

4. First, please execute [PrepareData](#) class to generate intermediate data. There is no parameter for this class. A command line example is shown below. It should be noted that the separating symbol of the `-cp` argument is [colon](#) for some operating systems (e.g., UNIX), and [semicolon](#) for other operating systems (e.g., Windows). We use colon in our examples. Also, the versions of downloaded libraries might differ from those used here.

```
java -Xms512M -Xmx32G
-cp ../jar/dp.jar:/lib/commons-math-1.2.jar:/lib/collections-generic-4.01.jar:/lib/auc.jar
:/lib/blas-0.8.jar:/lib/jung2-2_0_1.jar:/lib/liblinear-1.51.jar:/lib/utility.jar PrepareData
```

5. Second, please execute [BaselineDF](#) class to predict diffusions using the diffusion number for existing topics. There is no parameter for this class. An example is as below.

```
java -Xms512M -Xmx32G
-cp ../jar/dp.jar:/lib/commons-math-1.2.jar:/lib/collections-generic-4.01.jar:/lib/auc.jar
:/lib/blas-0.8.jar:/lib/jung2-2_0_1.jar:/lib/liblinear-1.51.jar:/lib/utility.jar BaselineDF
```

6. Next, please execute [BaselineIC](#) class to predict diffusions using the IC model. There is no parameter for this class. An example is as below.

```
java -Xms512M -Xmx32G
-cp ../jar/dp.jar:/lib/commons-math-1.2.jar:/lib/collections-generic-4.01.jar:/lib/auc.jar
:/lib/blas-0.8.jar:/lib/jung2-2_0_1.jar:/lib/liblinear-1.51.jar:/lib/utility.jar BaselineIC
```

7. Then, please execute [BaselineHD](#) class to predict diffusions using the HD model. The only parameter is the diffusion time. In our experiment, we found the best parameter value = 100. An example is as below.

```
java -Xms512M -Xmx32G
-cp ../jar/dp.jar:/lib/commons-math-1.2.jar:/lib/collections-generic-4.01.jar:/lib/auc.jar
:/lib/blas-0.8.jar:/lib/jung2-2_0_1.jar:/lib/liblinear-1.51.jar:/lib/utility.jar BaselineHD
100
```

8. Finally, please execute **LearningBased** class to predict diffusions using our proposed framework (the core class of our method is **classifier.ClassifierCV**; most instance / feature related information can be found in this class). The only parameter used in our method is the feature combination, which is encoded using a **7-digit number**, composed by **0 and 1**. The features are as below:

|                    |                                                     |
|--------------------|-----------------------------------------------------|
| Feature <b>1</b> : | <i>Topic Signature (TG)</i>                         |
| Feature <b>2</b> : | <i>Topic Similarity (TS)</i>                        |
| Feature <b>3</b> : | <i>User Signature (UG)</i>                          |
| Feature <b>4</b> : | <i>User Preferences to Latent Categories (UPLC)</i> |
| Feature <b>5</b> : | <i>In-degree (ID)</i>                               |
| Feature <b>6</b> : | <i>Out-degree (OD)</i>                              |
| Feature <b>7</b> : | <i>Number of Distinct Topics (NDT)</i>              |

For example, the parameter “0001101” indicates to perform learning-based prediction using the feature set UPLC + ID + NDT. An example is as below.

```
java -Xms512M -Xmx32G
-cp ../jar/dp.jar:/lib/commons-math-1.2.jar:/lib/collections-generic-4.01.jar:/lib/auc.jar
:/lib/blas-0.8.jar:/lib/jung2-2_0_1.jar:/lib/liblinear-1.51.jar:/lib/utility.jar
LearningBased 0001101
```

### Software Note

1. Please include all prerequisite libraries in the Java class path (e.g., use `-cp` command line argument to run Java).
2. Please set memory-related arguments (ex. use `-Xms512M -Xmx32G` to run Java). We suggest using 32GB RAM and 500GB hard disk space to run the program.

## Dataset

1. The data files are located in the `data/plurk_iii` folder:

|                                      |                                                               |
|--------------------------------------|---------------------------------------------------------------|
| <code>data/plurk_iii</code>          | Raw data                                                      |
| <code>data/plurk_iii/cvX</code>      | Preprocessed data for 4-fold cross validation ( $X$ = folder) |
| <code>data/plurk_iii/negative</code> | Sampled negative instance links                               |

2. **Raw data.** There are five types of files in the folder (the format are in **green brackets**):

- `topic_list.txt` is the list of 100 topics: **[topic\_id] [topic name and/or URL]**
- `user_plurk.txt` is the users in the *original* social network: **[user\_id] [nickname]**
- `relation_plurk.txt` is the relations in the *original* social network: **[user\_id] [friend\_id]**
- `message_conceptT_plurk.txt` is the messages for a topic ( $T$  = topic\_id): **[message\_id] [user\_id] [content] [time] [number\_of\_responses] [number\_of\_likes] [topic\_id]**
- `response_conceptT_plurk.txt` is the responses for a topic ( $T$  = topic\_id): **[response\_id] [message\_id] [user\_id] [content] [time] [topic\_id]**

3. **Preprocessed data.** There are two sub-folders (**train** and **test**). Each of them contains two types of files (using train as example):

- `sorted_T_train.txt` is the preprocessed responses for a topic ( $T$  = topic\_id): **[source\_user\_id] [destination\_user\_id] [time] [content]**
- `dn_T_train.txt` is the summarized information of responses on links for a topic ( $T$  = topic\_id): **[source\_user\_id] [destination\_user\_id] [diffusion\_number] [total\_diffusion\_content\_length] [diffusion\_number\_with\_URL] [diffusion\_number\_with\_IMG]**

4. **Negative instances.** There are five sub-folders (**cv1**, **cv2**, **cn3** and **cv4** is for testing, and **train\_unweighted** is for training). All files share the same format:

- `dn_T_test.txt` is the sampled negative links for a topic ( $T$  = topic\_id, note that the **positive\_or\_negative** field is always 0): **[source\_user\_id] [destination\_user\_id] [positive\_or\_negative]**

Please let us know if you have any question or suggestion. We appreciate your time for using our dataset and source code.
